# Supplementary material for: Network-based analysis of prostate cancer cell lines reveals novel marker gene candidates associated with radioresistance and patient relapse
Source: PubMed Central journal article supplement (PMC6855562; doi:10.1371/journal.pcbi.1007460), 2019-11-04
Supplement: pcbi.1007460.s002.pdf [file pcbi.1007460.s002.pdf]

**S1 Figure: Technical flow chart.**

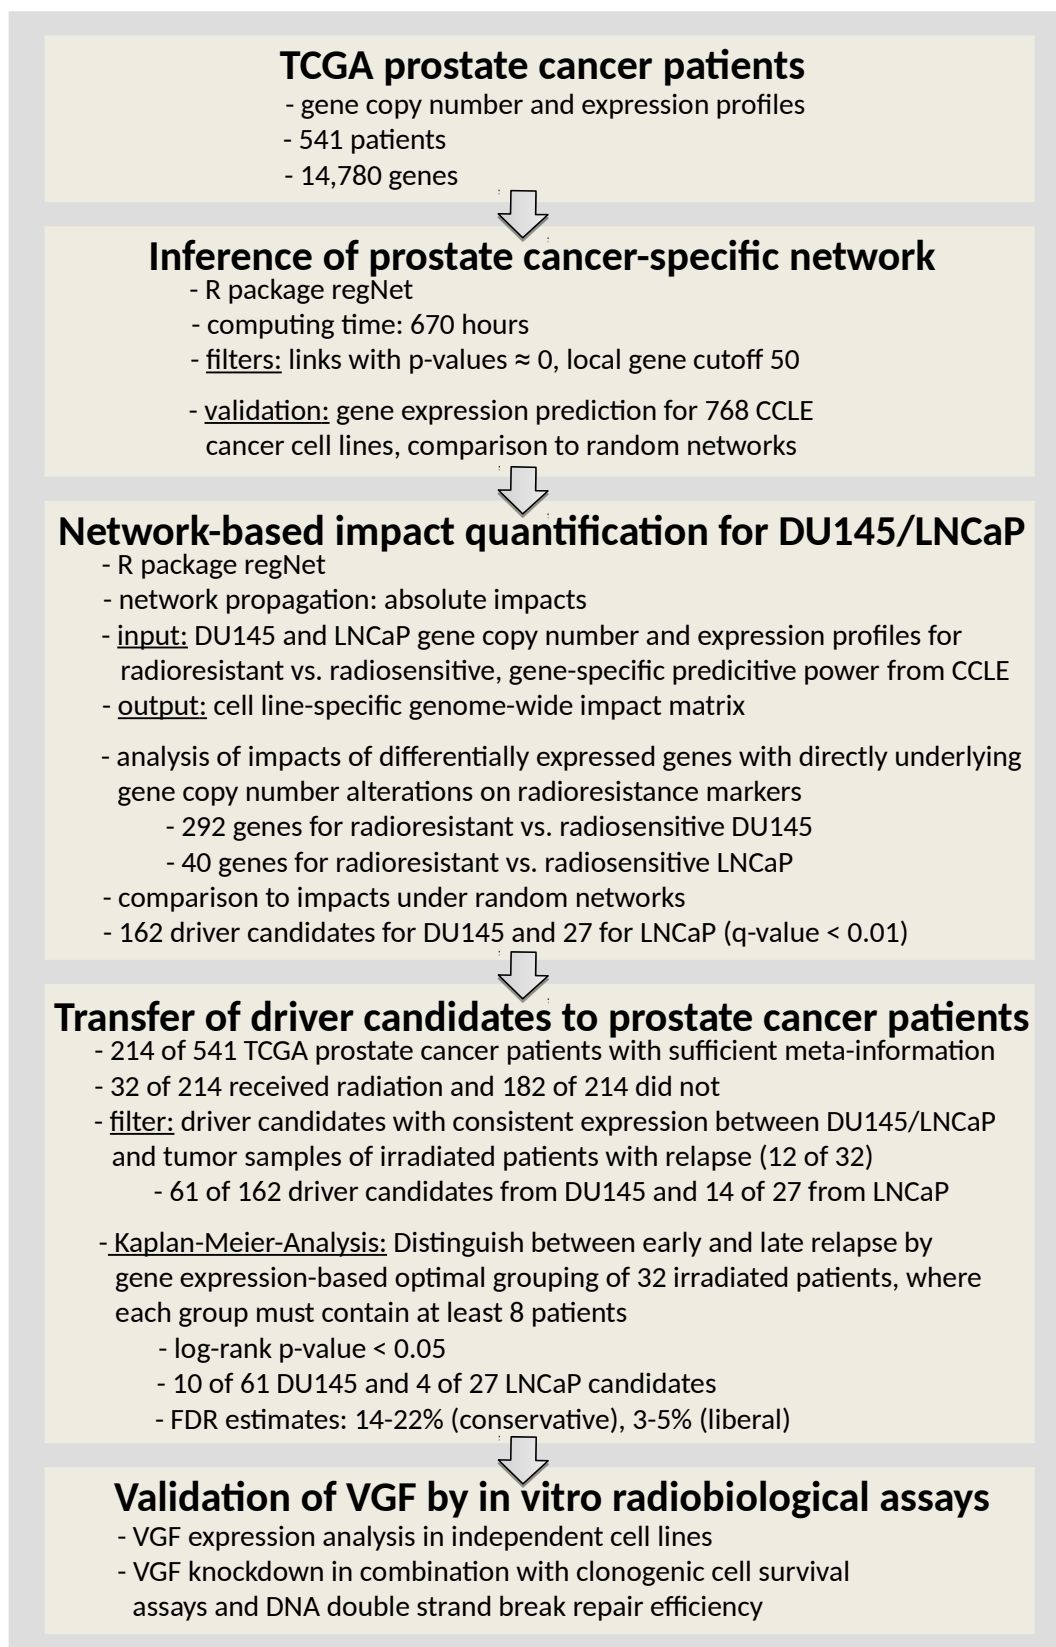

**S1 Figure:** Technical flow chart that outlines details of our developed computational data analysis pipeline for the identification of potential radioresistance driver genes. See Fig. 1 in main manuscript for a high-level overview.
