# Supplementary material for: Network-based analysis of prostate cancer cell lines reveals novel marker gene candidates associated with radioresistance and patient relapse
Source: PubMed Central journal article supplement (PMC6855562; doi:10.1371/journal.pcbi.1007460), 2019-11-04
Supplement: pcbi.1007460.s009.pdf [file pcbi.1007460.s009.pdf]

**S8 Figure: DU145, LNCaP and PC3: Monolayer vs. Spheres.**

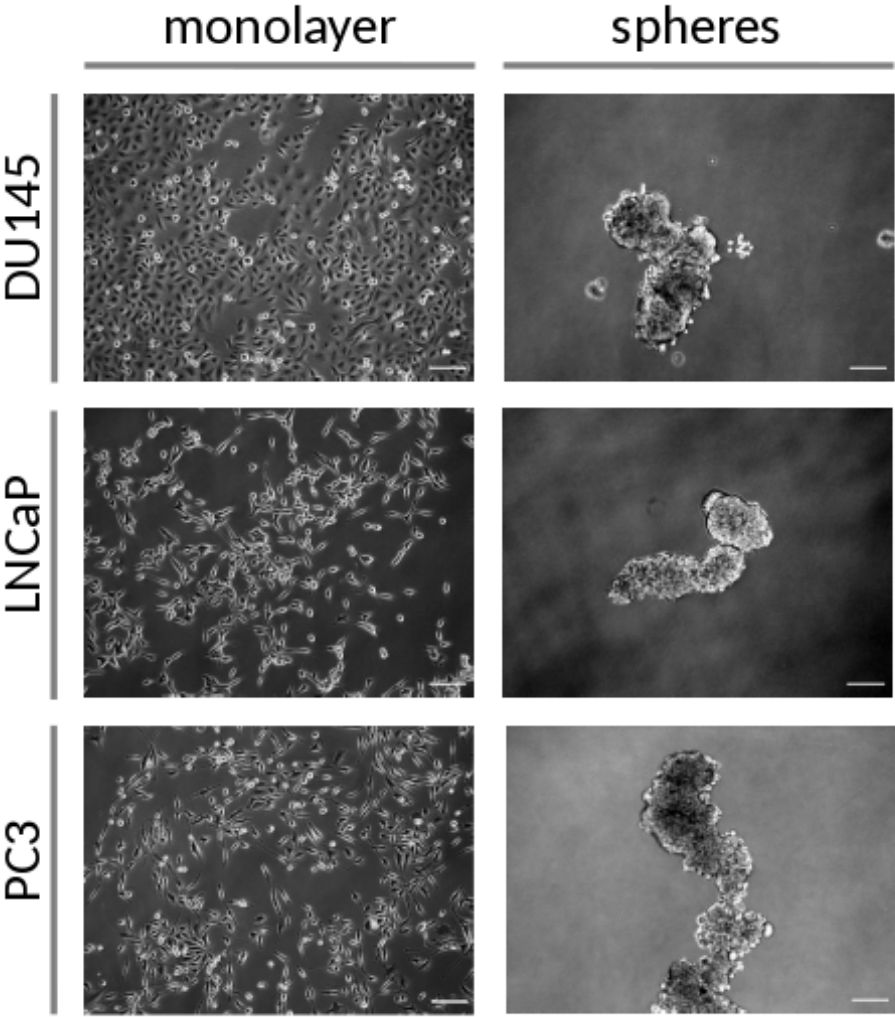

**S8 Figure:** Representative examples of microscope images of the cell lines DU145, LNCaP and PC3 grown under monolayer and sphere forming conditions. Scale bar size 100  $\mu\text{m}$ . Parental DU145 and LNCaP cell lines were considered for this analysis.
